# Supplementary material
Source: PubMed Central journal article supplement (PMC5616088)
Supplement: ac7b01709_si_001.pdf [file ac7b01709_si_001.pdf]

*Supporting Information*

***Large-scale Structural Characterization of Drug and Drug-Like Compounds by High-Throughput Ion Mobility-Mass Spectrometry***

Kelly M. Hines,<sup>1</sup> Dylan H. Ross,<sup>1</sup> Kimberly L. Davidson,<sup>2</sup> Matthew F. Bush,<sup>2</sup> Libin Xu<sup>1</sup>

<sup>1</sup>Department of Medicinal Chemistry, University of Washington, Seattle, WA

<sup>2</sup>Department of Chemistry, University of Washington, Seattle, WA

Address correspondence to:

Libin Xu, Ph.D.

Department of Medicinal Chemistry

University of Washington

Tel: (206) 543-1080

Fax: (206) 685-3252

Email: libinxu@uw.edu

**Table SI-1.** Comparison of CCS errors from calibration with PolyAla alone and PolyAla combined with the drug-like mixture.

| Calibrant         | [M+H] <sup>+</sup> | N <sub>2</sub> DT CCS<br>(Å <sup>2</sup> ) | Error of CCS <sub>cal</sub> (%) |                   |
|-------------------|--------------------|--------------------------------------------|---------------------------------|-------------------|
|                   |                    |                                            | PolyAla                         | PolyAla+Drug-like |
| Ala <sub>2</sub>  | 161.0926           | 136.1                                      | 0.1                             | 0.4               |
| Ala <sub>3</sub>  | 232.1300           | 150.8                                      | -0.3                            | 0.0               |
| Ala <sub>4</sub>  | 303.1670           | 163.3                                      | 0.2                             | 0.5               |
| Ala <sub>5</sub>  | 374.2040           | 177.6                                      | -0.1                            | 0.2               |
| Ala <sub>6</sub>  | 445.2410           | 190.8                                      | 0.2                             | 0.5               |
| Ala <sub>7</sub>  | 516.2780           | 206.0                                      | 0.0                             | 0.3               |
| Ala <sub>8</sub>  | 587.3150           | 222.7                                      | -0.1                            | 0.2               |
| Ala <sub>9</sub>  | 658.3520           | 236.4                                      | 0.1                             | 0.4               |
| Ala <sub>10</sub> | 729.3890           | 249.1                                      | 0.1                             | 0.3               |
| Ala <sub>11</sub> | 800.4260           | 262.6                                      | 0.1                             | 0.4               |
| Ala <sub>12</sub> | 871.4630           | 276.0                                      | 0.1                             | 0.4               |
| Ala <sub>13</sub> | 942.5010           | 289.3                                      | 0.1                             | 0.3               |
| Ala <sub>14</sub> | 1013.5370          | 300.8                                      | 0.2                             | 0.4               |
| Ala <sub>15</sub> | 1084.5740          | 312.8                                      | 0.4                             | 0.6               |
| Ala <sub>16</sub> | 1155.6110          | 327.1                                      | -0.3                            | -0.1              |
| Ala <sub>17</sub> | 1226.6480          | 338.2                                      | -0.3                            | 0.0               |
| Ala <sub>18</sub> | 1297.6850          | 350.1                                      | -0.5                            | -0.3              |
| Ala <sub>19</sub> | 1368.7220          | 359.3                                      | 0.1                             | 0.3               |
| Ala <sub>20</sub> | 1439.7590          | 370.2                                      | 0.0                             | 0.2               |
| Ala <sub>21</sub> | 1510.8218          | 379.5                                      | 0.5                             | 0.7               |
| Betaine           | 118.0895           | 121.5 <sup>a</sup>                         | -0.2                            | 0.0               |
| Alprenolol        | 250.1952           | 157.5 <sup>b</sup>                         | 0.1                             | 0.4               |
| Ondansetron       | 294.1745           | 172.7 <sup>b</sup>                         | -1.3                            | -1.0              |
| Clozapine N-oxide | 343.1425           | 180.6 <sup>b</sup>                         | -0.9                            | -0.6              |
| Verapamil         | 455.3119           | 210.0 <sup>b</sup>                         | -1.1                            | -0.8              |
| Reserpine         | 609.3069           | 254.3 <sup>b</sup>                         | -3.2                            | -2.9              |
| Erythromycin      | 734.4884           | 257.3                                      | 0.8                             | 1.1               |
| Peptide K-8       | 1072.5385          | 320.7                                      | -0.6                            | -0.4              |
| Vancomycin        | 1448.5166          | 387.2                                      | -1.4                            | -1.1              |

<sup>a</sup> Nitrogen drift tube CCS values from Agilent CCS Calibration Mix, Agilent Technologies.<sup>b</sup> Nitrogen drift tube CCS values from Campuzano *et al.*, *Anal. Chem.* **2012**, *84*, 1026.

**Table SI-2.** Comparison of TWIM calibrated N<sub>2</sub> CCS values against DTIM N<sub>2</sub> CCS values from Zhou *et al.* for select compounds.

| Compounds             | <i>m/z</i> | Adduct                              | CCS <sub>CAL</sub><br>(Å <sup>2</sup> ) | CCS <sub>Zhou et al.</sub><br>(Å <sup>2</sup> ) <sup>a</sup> | % Difference<br>CCS <sub>CAL</sub> : CCS <sub>Zhou et al.</sub> |
|-----------------------|------------|-------------------------------------|-----------------------------------------|--------------------------------------------------------------|-----------------------------------------------------------------|
| Choline               | 104.108    | M <sup>+</sup>                      | 121.0                                   | 117.8                                                        | -2.7                                                            |
| Histamine             | 112.087    | [M+H] <sup>+</sup>                  | 120.3                                   | 120.0                                                        | -0.2                                                            |
| Betaine               | 118.086    | [M+H] <sup>+</sup>                  | 122.5                                   | 121.4                                                        | -0.9                                                            |
| Creatinine            | 114.066    | [M+H] <sup>+</sup>                  | 120.2                                   | 123.4                                                        | 2.6                                                             |
| Adenine               | 136.062    | [M+H] <sup>+</sup>                  | 122.4                                   | 125.1                                                        | 2.1                                                             |
| Hypoxanthine          | 137.046    | [M+H] <sup>+</sup>                  | 123.1                                   | 127.1                                                        | 3.7                                                             |
| Acetylcholine         | 146.118    | [M+H] <sup>+</sup>                  | 130.1                                   | 129.7                                                        | -0.3                                                            |
| Carnitine             | 162.113    | [M+H] <sup>+</sup>                  | 132.9                                   | 133.1                                                        | 0.1                                                             |
| Arginine              | 175.119    | [M+H] <sup>+</sup>                  | 135.5                                   | 136.4                                                        | 0.6                                                             |
| Norepinephrine        | 152.077    | [M+H-H <sub>2</sub> O] <sup>+</sup> | 132.6                                   | 136.8                                                        | 3.1                                                             |
| Theophylline          | 181.072    | [M+H] <sup>+</sup>                  | 133.5                                   | 137.6                                                        | 3.1                                                             |
| Cystine               | 241.031    | [M+H] <sup>+</sup>                  | 148.1                                   | 149.4                                                        | 0.8                                                             |
| Biotin                | 245.096    | [M+H] <sup>+</sup>                  | 148.0                                   | 150.4                                                        | 1.6                                                             |
| Melatonin             | 233.129    | [M+H] <sup>+</sup>                  | 152.0                                   | 154.3                                                        | 1.5                                                             |
| Thiamine              | 265.112    | M <sup>+</sup>                      | 155.9                                   | 162.4                                                        | 4.1                                                             |
| Glutathione           | 308.091    | [M+H] <sup>+</sup>                  | 165.7                                   | 167.4                                                        | 1.0                                                             |
| N-acetylneuramic acid | 332.095    | [M+Na] <sup>+</sup>                 | 166.6                                   | 168.6                                                        | 1.2                                                             |
| Adenosine phosphate   | 348.070    | [M+H] <sup>+</sup>                  | 167.6                                   | 171.4                                                        | 2.2                                                             |
| Testosterone          | 289.216    | [M+H] <sup>+</sup>                  | 170.6                                   | 172.7                                                        | 1.2                                                             |
| Melibiose             | 365.105    | [M+Na] <sup>+</sup>                 | 174.8                                   | 176.8                                                        | 1.1                                                             |
| Cellobiose            | 365.105    | [M+Na] <sup>+</sup>                 | 175.7                                   | 178.1                                                        | 1.4                                                             |
| Progesterone          | 315.232    | [M+H] <sup>+</sup>                  | 177.8                                   | 181.2                                                        | 1.9                                                             |
| Riboflavin            | 377.146    | [M+H] <sup>+</sup>                  | 184.9                                   | 188.3                                                        | 1.8                                                             |
| Cortisone             | 361.201    | [M+H] <sup>+</sup>                  | 184.4                                   | 188.6                                                        | 2.2                                                             |
| Hydrocortisone        | 363.217    | [M+H] <sup>+</sup>                  | 185.1                                   | 189.1                                                        | 2.2                                                             |
| Cholic acid           | 431.277    | [M+Na] <sup>+</sup>                 | 195.6                                   | 197.3                                                        | 0.9                                                             |
| Curcumin              | 369.133    | [M+H] <sup>+</sup>                  | 198.5                                   | 201.6                                                        | 1.5                                                             |
| Glycholic acid        | 488.298    | [M+Na] <sup>+</sup>                 | 200.8                                   | 202.0                                                        | 0.6                                                             |
| Lathosterol           | 369.352    | [M+H-H <sub>2</sub> O] <sup>+</sup> | 204.0                                   | 204.5                                                        | 0.2                                                             |
| Naringin              | 603.168    | [M+Na] <sup>+</sup>                 | 233.5                                   | 237.5                                                        | 1.7                                                             |
| Protoporphyrin IX     | 563.265    | [M+H] <sup>+</sup>                  | 238.8                                   | 241.4                                                        | 1.1                                                             |

<sup>a</sup> Nitrogen drift tube CCS values from Zhou *et al.*, *Anal. Chem.* **2016**, *88*, 11084-11091.

**Table SI-3.** Comparison of TWIM calibrated N<sub>2</sub> CCS values against N<sub>2</sub> CCS values determined on the modified Waters Synapt G2 HDMS containing a radio-frequency confining drift cell for select compounds.

| Compounds        | <i>m/z</i> | Adduct                              | CCS <sub>CAL</sub><br>(Å <sup>2</sup> ) | CCS <sub>RF-DT</sub><br>(Å <sup>2</sup> ) | %RSD<br>CCS <sub>RF-DT</sub> | % Difference<br>CCS <sub>CAL</sub> : CCS <sub>RF-DT</sub> |
|------------------|------------|-------------------------------------|-----------------------------------------|-------------------------------------------|------------------------------|-----------------------------------------------------------|
| Hypoxanthine     | 137.046    | [M+H] <sup>+</sup>                  | 123.1                                   | 124.4                                     | 0.6                          | 1.0                                                       |
| Norepinephrine   | 152.077    | [M+H-H <sub>2</sub> O] <sup>+</sup> | 132.6                                   | 133.5                                     | 0.0                          | 0.7                                                       |
| Phenacetin       | 180.102    | [M+H] <sup>+</sup>                  | 140.5                                   | 138.6                                     | 0.3                          | -1.4                                                      |
| Theophylline     | 181.072    | [M+H] <sup>+</sup>                  | 133.5                                   | 133.7                                     | 0.1                          | 0.2                                                       |
| Thiamine         | 265.112    | M <sup>+</sup>                      | 155.9                                   | 160.0                                     | 0.5                          | 2.6                                                       |
| Desipramine      | 267.186    | [M+H] <sup>+</sup>                  | 162.1                                   | 160.6                                     | 0.3                          | -0.9                                                      |
| Dextromethorphan | 272.201    | [M+H] <sup>+</sup>                  | 165.2                                   | 162.8                                     | 0.2                          | -1.4                                                      |
| Fluoxetine       | 310.141    | [M+H] <sup>+</sup>                  | 174.5                                   | 175.1                                     | 0.4                          | 0.4                                                       |
| Chlorpromazine   | 319.103    | [M+H] <sup>+</sup>                  | 169.8                                   | 168.5                                     | 0.2                          | -0.8                                                      |
| Ciprofloxacin    | 332.141    | [M+H] <sup>+</sup>                  | 185.3                                   | 187.3                                     | 0.3                          | 1.1                                                       |
| Thioridazine     | 371.161    | [M+H] <sup>+</sup>                  | 185.0                                   | 183.6                                     | 0.2                          | -0.8                                                      |
| Tamoxifen        | 372.232    | [M+H] <sup>+</sup>                  | 197.2                                   | 194.0                                     | 0.3                          | -1.7                                                      |
| Diltiazem        | 415.169    | [M+H] <sup>+</sup>                  | 196.1                                   | 194.8                                     | 0.1                          | -0.7                                                      |
| Raloxifene       | 474.173    | [M+H] <sup>+</sup>                  | 213.4                                   | 212.7                                     | 0.1                          | -0.3                                                      |

**Table SI-4.** Comparison of N<sub>2</sub> CCS values reported by Zhou *et al.* against those determined on the modified Waters Synapt G2 HDMS containing a radio-frequency confining drift cell for select compounds.

| Compounds      | <i>m/z</i> | Adduct                              | CCS <sub>RF-DT</sub><br>(Å <sup>2</sup> ) | CCS <sub>Zhou et al.</sub><br>(Å <sup>2</sup> ) <sup>a</sup> | % Difference<br>CCS <sub>RF-DT</sub> : CCS <sub>Zhou et al.</sub> |
|----------------|------------|-------------------------------------|-------------------------------------------|--------------------------------------------------------------|-------------------------------------------------------------------|
| Hypoxanthine   | 137.046    | [M+H] <sup>+</sup>                  | 124.4                                     | 127.8                                                        | -2.7                                                              |
| Norepinephrine | 152.077    | [M+H-H <sub>2</sub> O] <sup>+</sup> | 133.5                                     | 136.8                                                        | -2.4                                                              |
| Theophylline   | 181.072    | [M+H] <sup>+</sup>                  | 133.7                                     | 137.6                                                        | -2.9                                                              |
| Thiamine       | 265.112    | M <sup>+</sup>                      | 160.0                                     | 162.4                                                        | -1.5                                                              |

<sup>a</sup> Nitrogen drift tube CCS values from Zhou *et al.*, *Anal. Chem.* **2016**, 88, 11084-11091.

**Table SI-5.** Comparison of TWIM calibrated CCS values from this work versus TWIM calibrated CCS values presented elsewhere for select compounds.

| Compounds      | <i>m/z</i> | Adduct              | CCS <sub>Hines et al.</sub><br>(Å <sup>2</sup> ) | CCS <sub>Alelyunas et al.</sub><br>(Å <sup>2</sup> ) <sup>a</sup> | % Difference |
|----------------|------------|---------------------|--------------------------------------------------|-------------------------------------------------------------------|--------------|
| Tacrine        | 199.123    | [M+H] <sup>+</sup>  | 141.4                                            | 141.2                                                             | 0.2          |
| Pilocarpine    | 209.129    | [M+H] <sup>+</sup>  | 146.4                                            | 146.7                                                             | -0.2         |
| Altretamine    | 211.167    | [M+H] <sup>+</sup>  | 145.6                                            | 146.0                                                             | -0.3         |
| Lidocaine      | 235.181    | [M+H] <sup>+</sup>  | 155.4                                            | 156.8                                                             | -0.8         |
| Pindolol       | 249.160    | [M+H] <sup>+</sup>  | 157.6                                            | 159.2                                                             | -1.0         |
| Lamtrigine     | 256.015    | [M+H] <sup>+</sup>  | 150.6                                            | 151.1                                                             | -0.3         |
| Imipramine     | 281.201    | [M+H] <sup>+</sup>  | 165.1                                            | 165.5                                                             | -0.2         |
| Promethazine   | 285.142    | [M+H] <sup>+</sup>  | 162.7                                            | 163.6                                                             | -0.6         |
| Terbinafine    | 292.206    | [M+H] <sup>+</sup>  | 185.6                                            | 187.6                                                             | -1.1         |
| Dobutamine     | 302.175    | [M+H] <sup>+</sup>  | 168.0                                            | 168.9                                                             | -0.6         |
| Amoxapine      | 314.106    | [M+H] <sup>+</sup>  | 171.2                                            | 171.8                                                             | -0.3         |
| Timolol        | 317.164    | [M+H] <sup>+</sup>  | 174.6                                            | 175.8                                                             | -0.7         |
| Chlorpromazine | 319.103    | [M+H] <sup>+</sup>  | 169.8                                            | 170.6                                                             | -0.5         |
| Escitalopram   | 325.171    | [M+H] <sup>+</sup>  | 178.8                                            | 179.7                                                             | -0.5         |
| Citalopram     | 325.171    | [M+H] <sup>+</sup>  | 178.9                                            | 179.1                                                             | -0.1         |
| Clozapine      | 327.137    | [M+H] <sup>+</sup>  | 177.5                                            | 178.4                                                             | -0.5         |
| Piroxicam      | 332.070    | [M+H] <sup>+</sup>  | 170.7                                            | 171.6                                                             | -0.5         |
| Naltrexone     | 342.170    | [M+H] <sup>+</sup>  | 176.0                                            | 176.7                                                             | -0.4         |
| Propafenone    | 342.206    | [M+H] <sup>+</sup>  | 177.2                                            | 178.1                                                             | -0.5         |
| Meloxicam      | 352.043    | [M+H] <sup>+</sup>  | 174.5                                            | 175.5                                                             | -0.5         |
| Pioglitazone   | 357.127    | [M+H] <sup>+</sup>  | 178.0                                            | 177.9                                                             | 0.1          |
| Bisacodyl      | 362.139    | [M+H] <sup>+</sup>  | 193.3                                            | 193.9                                                             | -0.3         |
| Bumetanide     | 365.117    | [M+H] <sup>+</sup>  | 185.1                                            | 186.2                                                             | -0.6         |
| Haloperidol    | 376.147    | [M+H] <sup>+</sup>  | 191.7                                            | 193.5                                                             | -0.9         |
| Celecoxib      | 382.083    | [M+H] <sup>+</sup>  | 186.1                                            | 186.5                                                             | -0.2         |
| Prazosin       | 384.167    | [M+H] <sup>+</sup>  | 193.4                                            | 193.6                                                             | -0.1         |
| Quetiapine     | 384.174    | [M+H] <sup>+</sup>  | 191.5                                            | 191.8                                                             | -0.2         |
| Buspirone      | 386.255    | [M+H] <sup>+</sup>  | 197.7                                            | 197.9                                                             | -0.1         |
| Moxifloxacin   | 402.183    | [M+H] <sup>+</sup>  | 195.0                                            | 196.8                                                             | -0.9         |
| Carvedilol     | 407.197    | [M+H] <sup>+</sup>  | 189.1                                            | 188.9                                                             | 0.1          |
| Lincomycin     | 407.221    | [M+H] <sup>+</sup>  | 199.1                                            | 200.6                                                             | -0.7         |
| Diltiazem      | 415.169    | [M+H] <sup>+</sup>  | 196.1                                            | 196.1                                                             | 0.0          |
| Clindamycin    | 425.187    | [M+H] <sup>+</sup>  | 200.6                                            | 202.2                                                             | -0.8         |
| Mycophenolate  | 434.217    | [M+H] <sup>+</sup>  | 197.3                                            | 196.6                                                             | 0.4          |
| Fluphenazine   | 438.182    | [M+H] <sup>+</sup>  | 197.5                                            | 197.2                                                             | 0.1          |
| Aripiprazole   | 448.155    | [M+H] <sup>+</sup>  | 203.5                                            | 204.5                                                             | -0.5         |
| Loperamide     | 477.230    | [M+H] <sup>+</sup>  | 219.4                                            | 221.9                                                             | -1.1         |
| Vardenafil     | 489.228    | [M+H] <sup>+</sup>  | 224.5                                            | 227.2                                                             | -1.2         |
| Dipyridamole   | 505.325    | [M+H] <sup>+</sup>  | 223.9                                            | 225.3                                                             | -0.6         |
| Ketoconazole   | 531.156    | [M+H] <sup>+</sup>  | 214.5                                            | 214.6                                                             | -0.1         |
| Azithromycin   | 749.516    | [M+H] <sup>+</sup>  | 263.5                                            | 265.1                                                             | -0.6         |
| Vinblastine    | 811.428    | [M+H] <sup>+</sup>  | 278.5                                            | 284.2                                                             | -2.0         |
| Rifampicin     | 823.412    | [M+H] <sup>+</sup>  | 280.3                                            | 286.4                                                             | -2.1         |
| Ivermectin     | 897.499    | [M+Na] <sup>+</sup> | 292.7                                            | 299.9                                                             | -2.4         |
| Sirolimus      | 936.544    | [M+Na] <sup>+</sup> | 311.6                                            | 323.1                                                             | -3.6         |

<sup>a</sup> Nitrogen TWIM CCS values from Y. W. Alelyunas *et al.*, *Waters Application Note 720005903EN* 2017, Milford, MA: Waters Corporation.

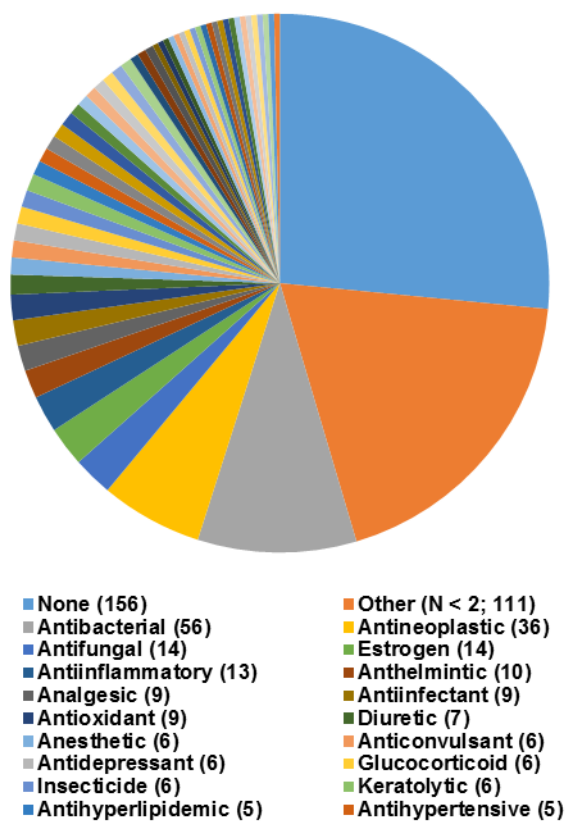

**Figure SI-1.** A summary of the bioactivities of the 560 drug and drug-like compounds that were not successfully determined in this analysis.

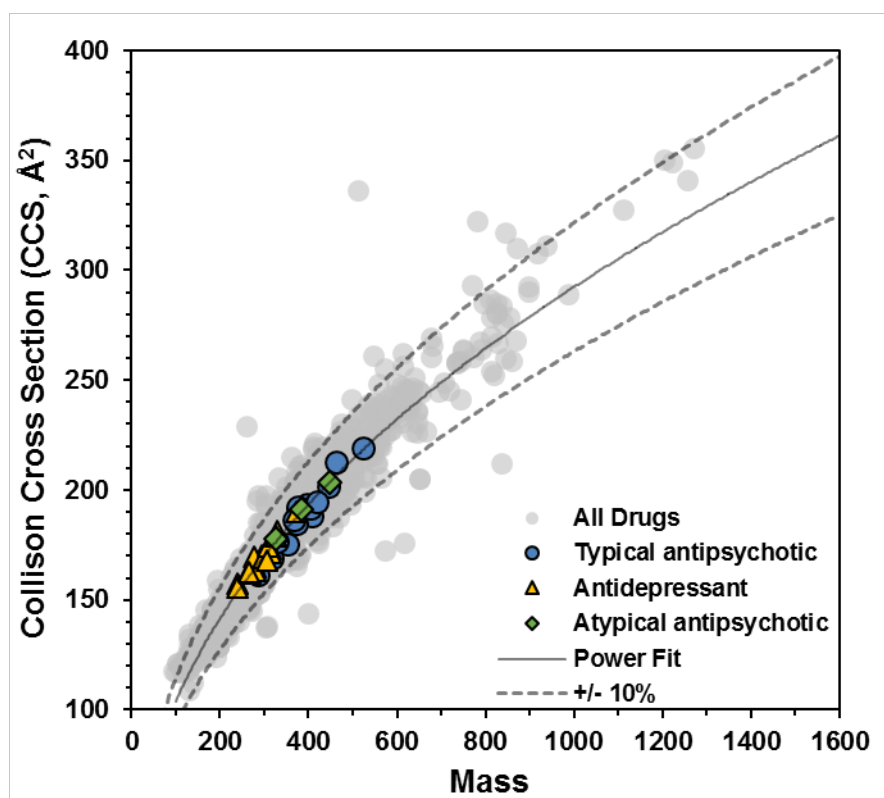

**Figure SI-2.** CCS versus mass trends of antidepressants, typical antipsychotics, and atypical antipsychotics. Antidepressants include SNRIs, SSRIs, NDRIs and NRIs.

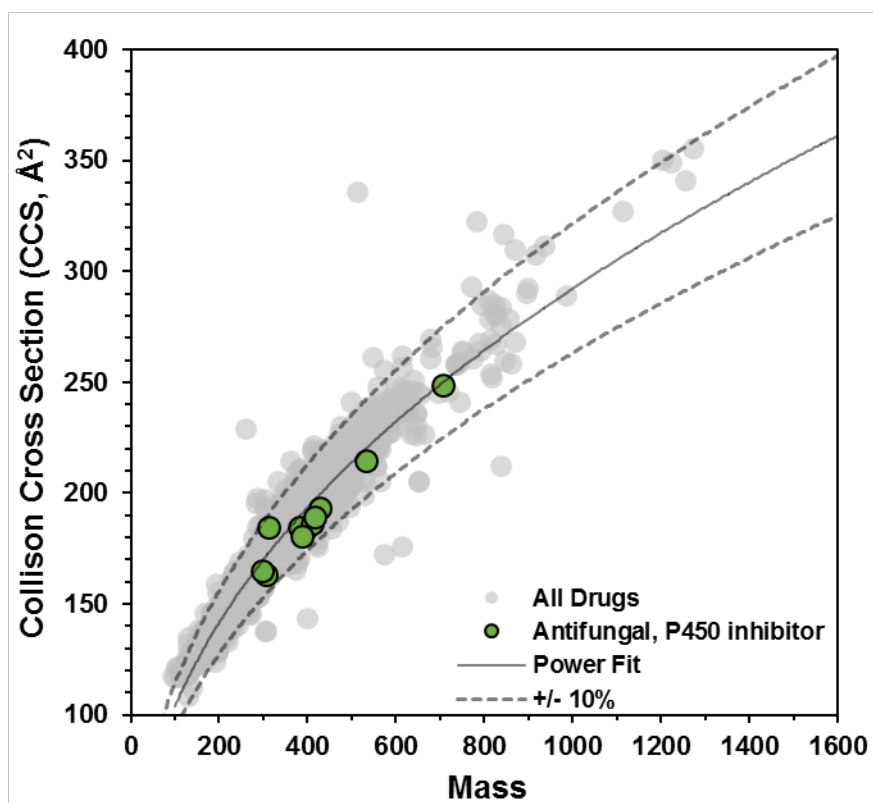

Figure SI-3. CCS versus mass trend for the antifungal P450 inhibitors.



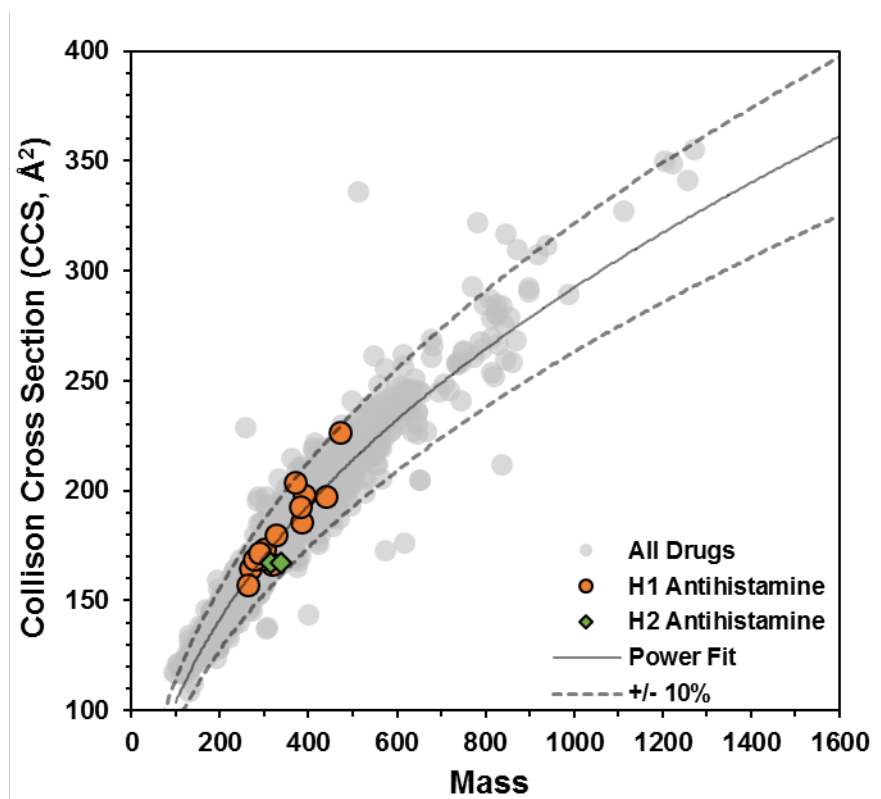

Figure SI-4. CCS versus mass trends for H1 and H2 antihistamines.

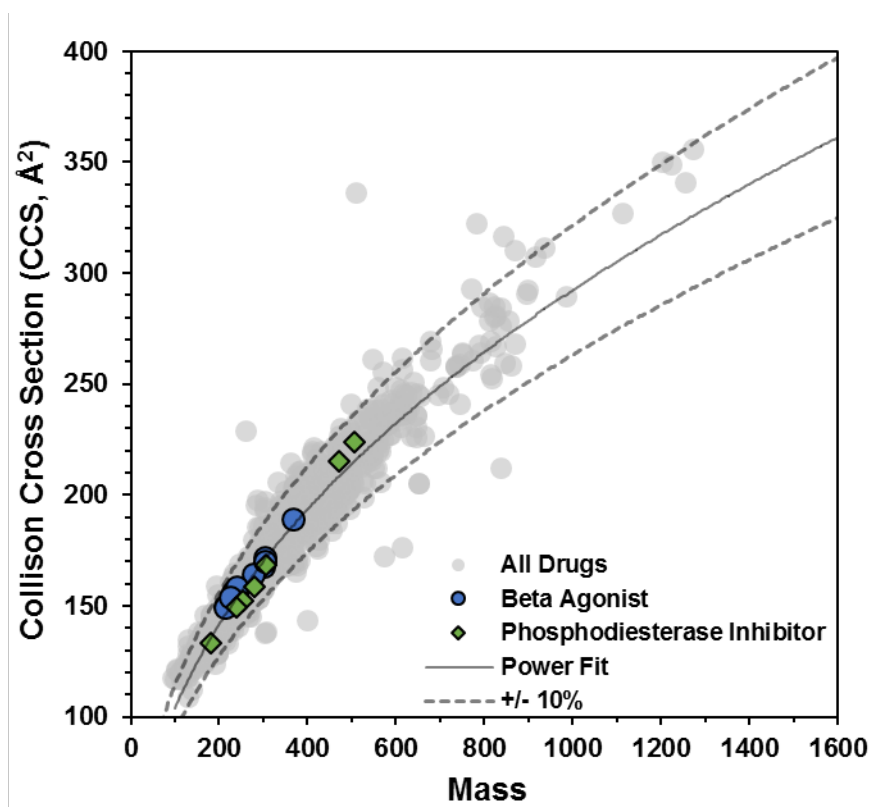

**Figure SI-5.** CCS versus mass trends for the beta agonist and phosphodiesterase inhibitors which are used as vasodilators and bronchodilators.

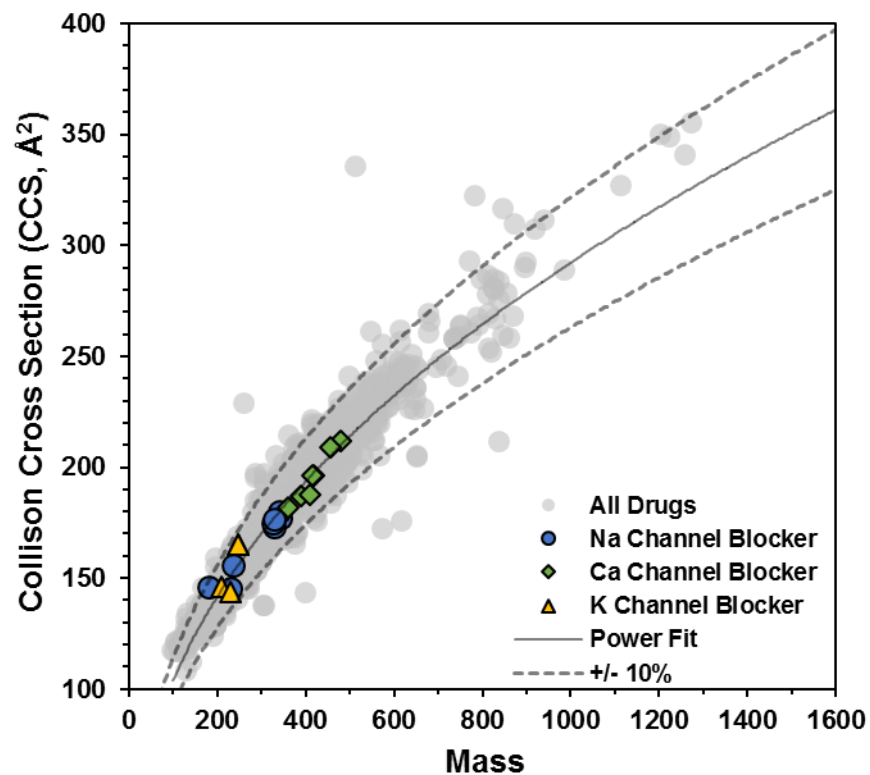

**Figure SI-6.** CCS versus mass trends for various ion channel blockers. Sodium channel blockers are mostly antiarrhythmic drugs. Calcium channel blockers are mostly vasodilators. Potassium channel blockers are mostly antihypertensive drugs.

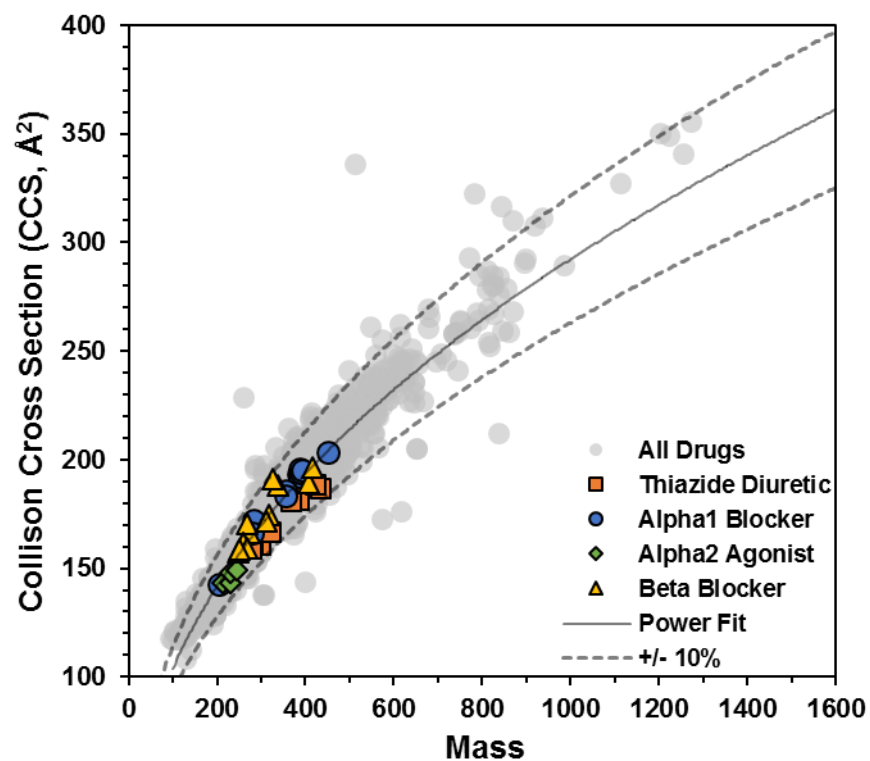

**Figure SI-7.** CCS versus mass trends for thiazide diuretics, alpha1 blockers, and alpha2 agonists. Alpha 1 blockers and alpha 2 agonists are antihypertensive drugs.

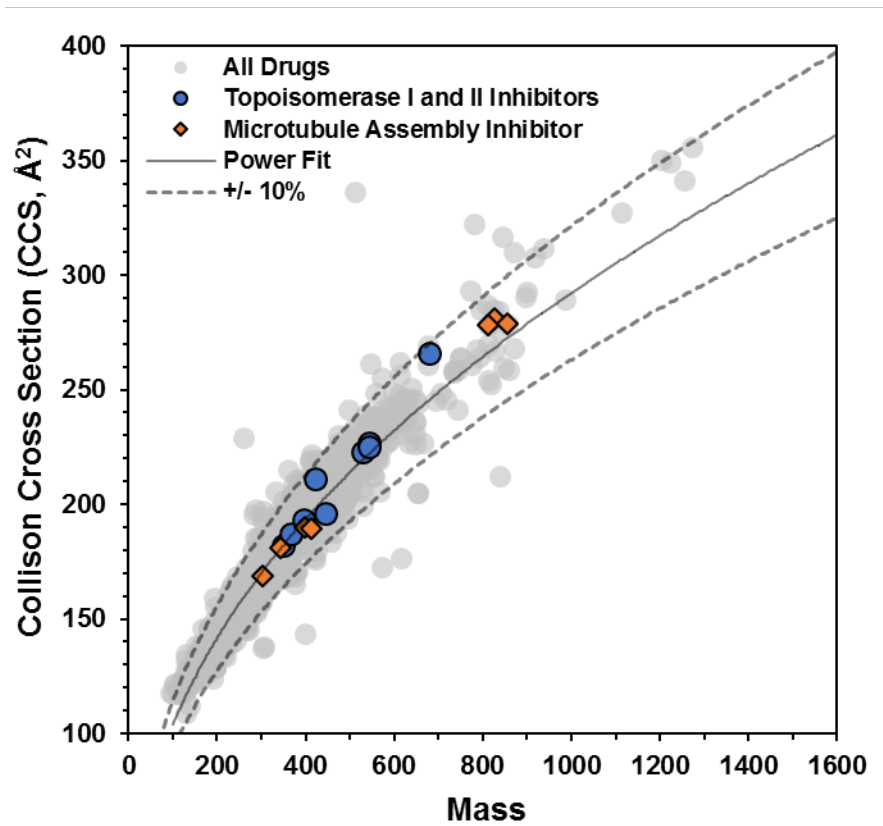

**Figure SI-8.** CCS versus mass trends for antineoplastic topoisomerase I and II inhibitors and microtubule assembly inhibitors.

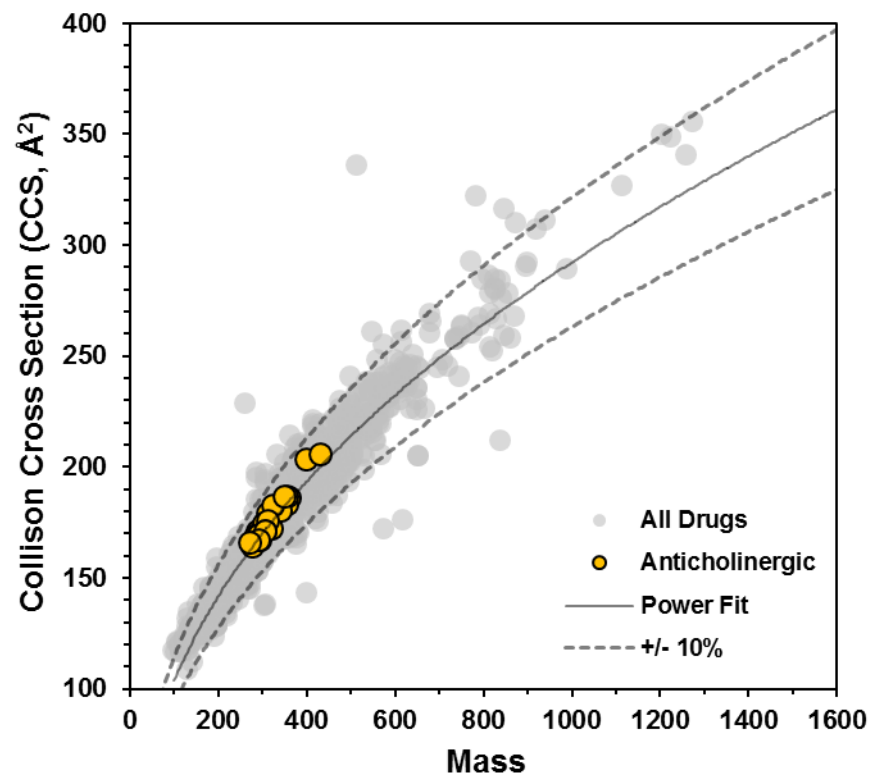

Figure SI-9. CCS versus mass trend for the anticholinergic drugs.

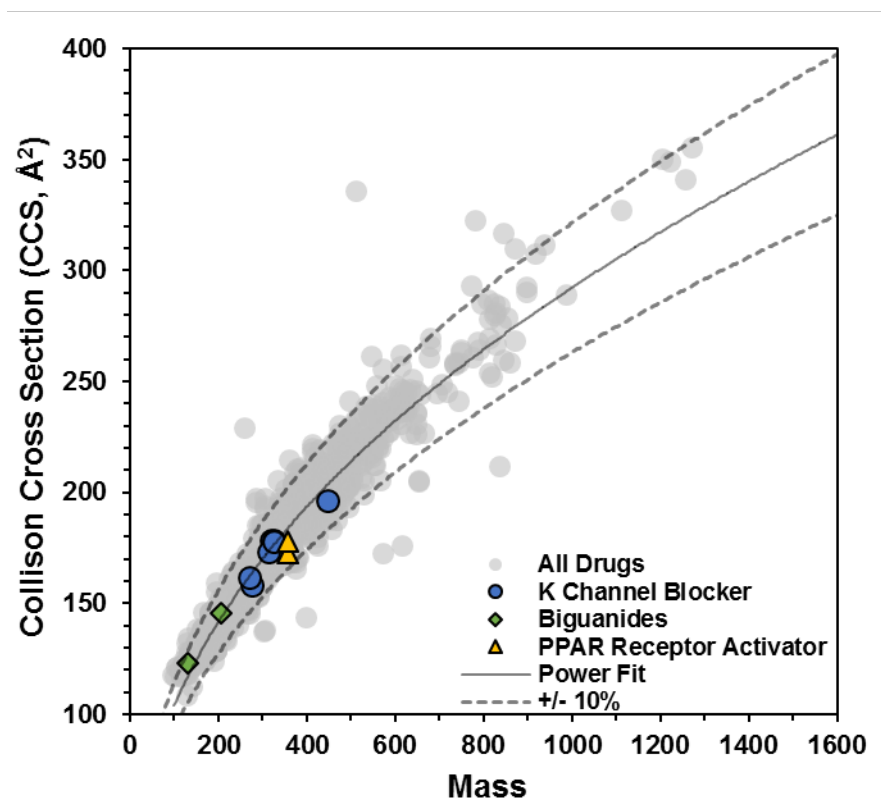

**Figure SI-10.** CCS versus mass trends for K channel blockers, biguanides, and PPAR receptor activators which are used in the treatment of diabetes.

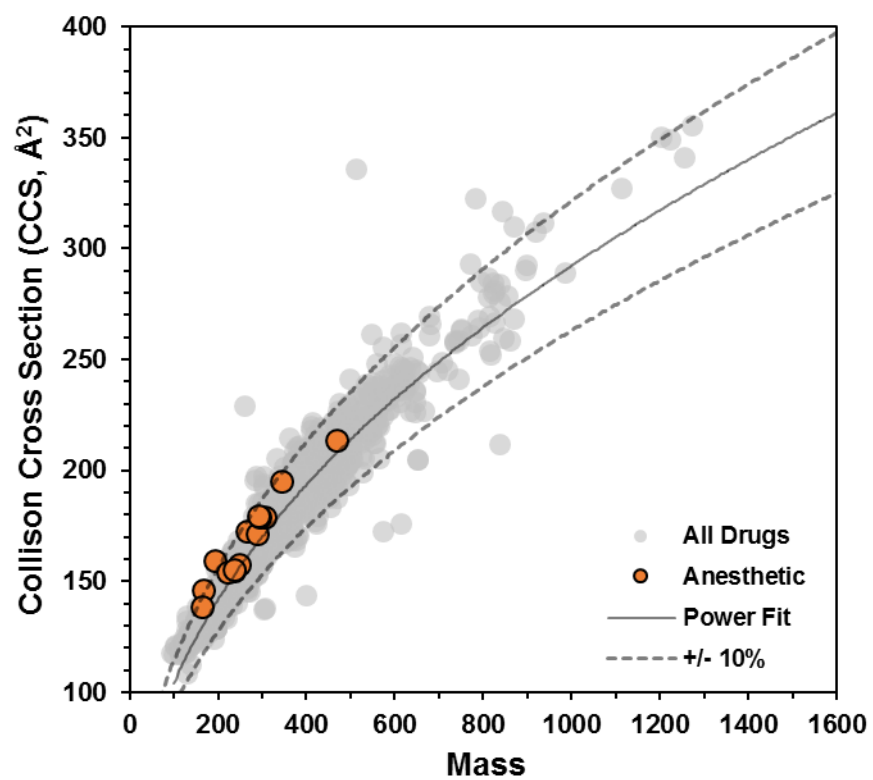

Figure SI-11. CCS versus mass trend for the local and topical anesthetics.



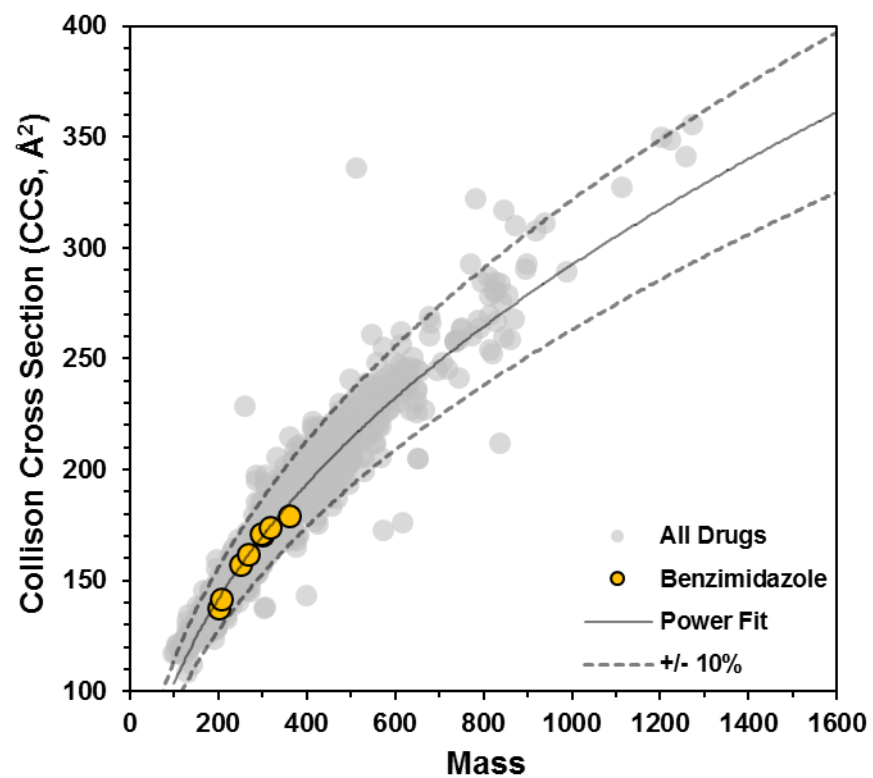

Figure SI-12. CCS versus mass trend for the benzimidazole anthelmintic drugs.

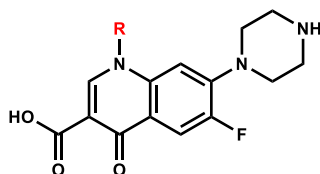

**Ciprofloxacin**

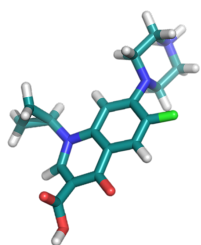

R = Propyl

Comp: 188.7 Å<sup>2</sup>

Exp: 185.3 Å<sup>2</sup>

ΔComp-Exp: 1.8%

**Enoxacin**

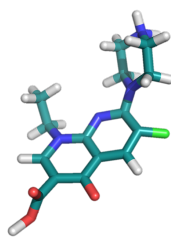

R = Ethyl

Comp: 189.7 Å<sup>2</sup>

Exp: 184.7 Å<sup>2</sup>

ΔComp-Exp: 2.7%

**Sarafloxacin**

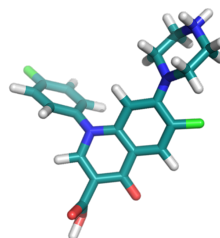

R = Fluorobenzyl

Comp: 202.5 Å<sup>2</sup>

Exp: 199.3 Å<sup>2</sup>

ΔComp-Exp: 1.6%

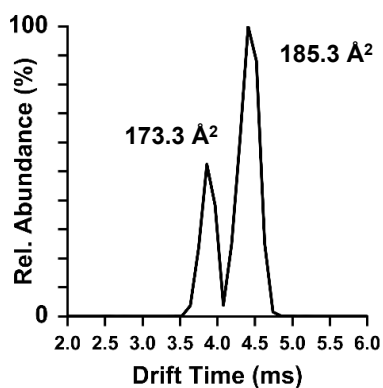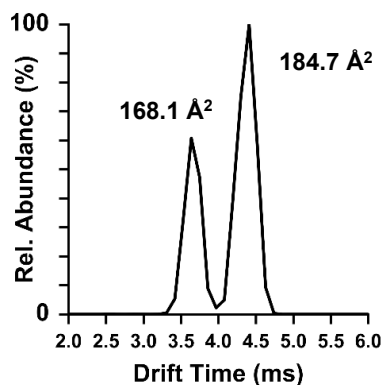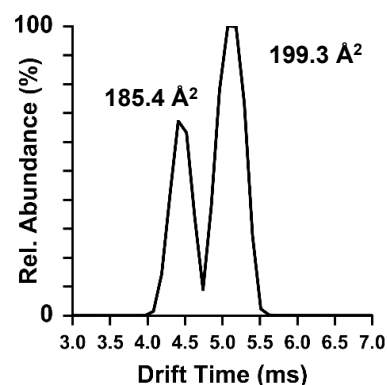

**Figure SI-13.** Several fluoroquinolones showed bimodal arrival time distributions. Molecular modeling by MMFF94 and CCS calculation by MobCal were able to match the larger of the two conformations for each of the fluoroquinolones with 3%. The CCS values of fluoroquinolones scale with increasing size of the R group. Note that the aromatic ring for enoxacin is a pyridine ring, instead of a phenyl ring.

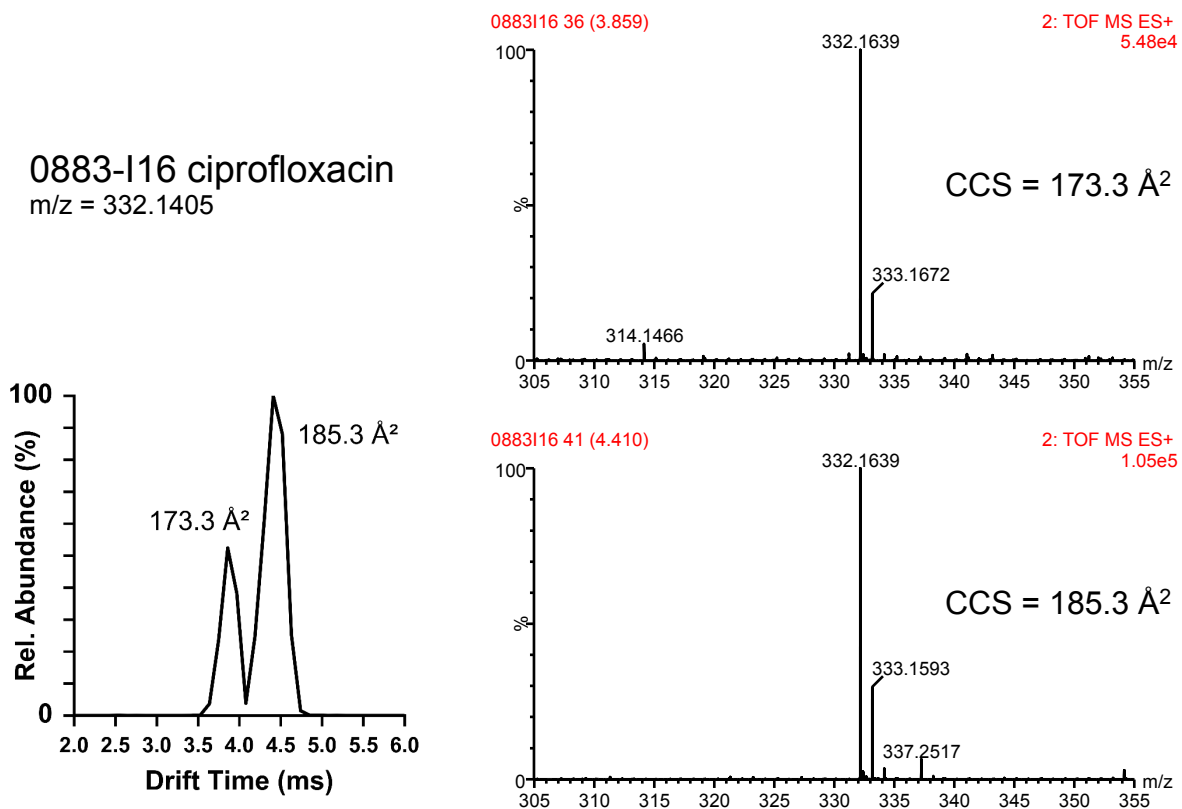

Figure SI-14. Drift time chromatogram and mass spectra of ciprofloxacin.

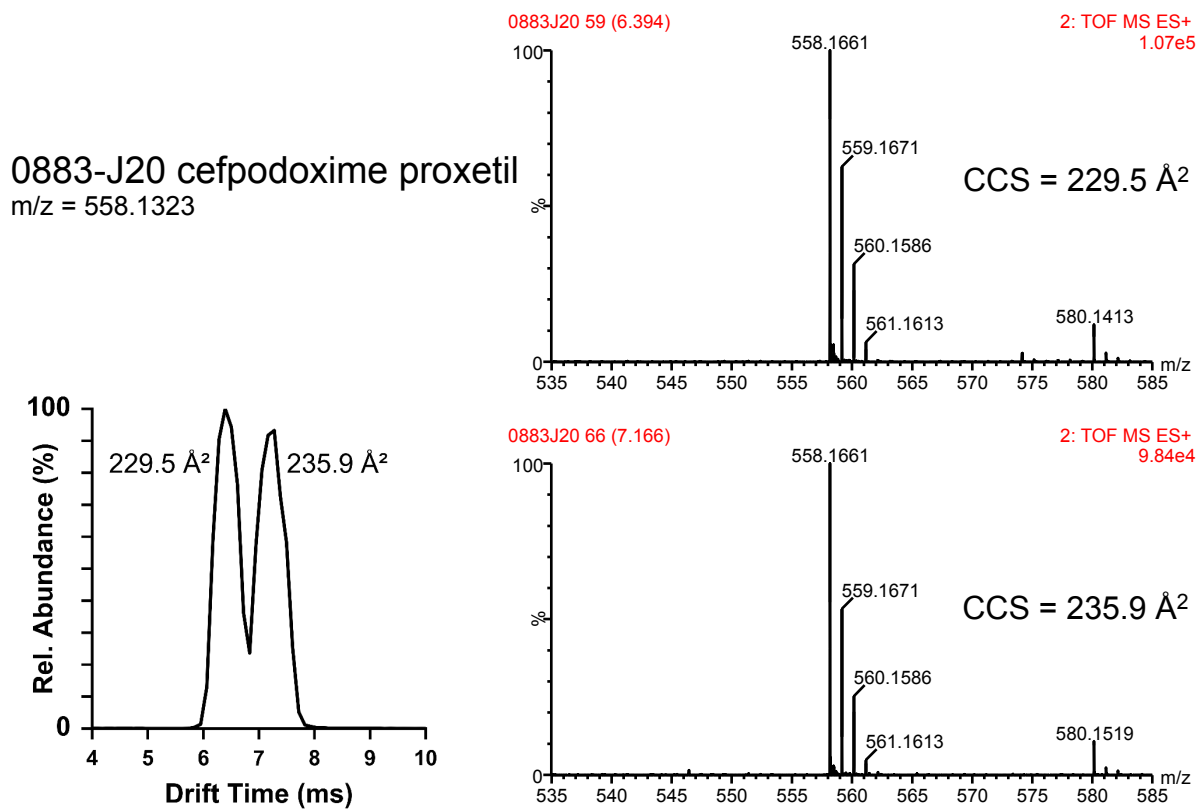

Figure SI-15. Drift time chromatogram and mass spectra of cefpodoxime proxetil.

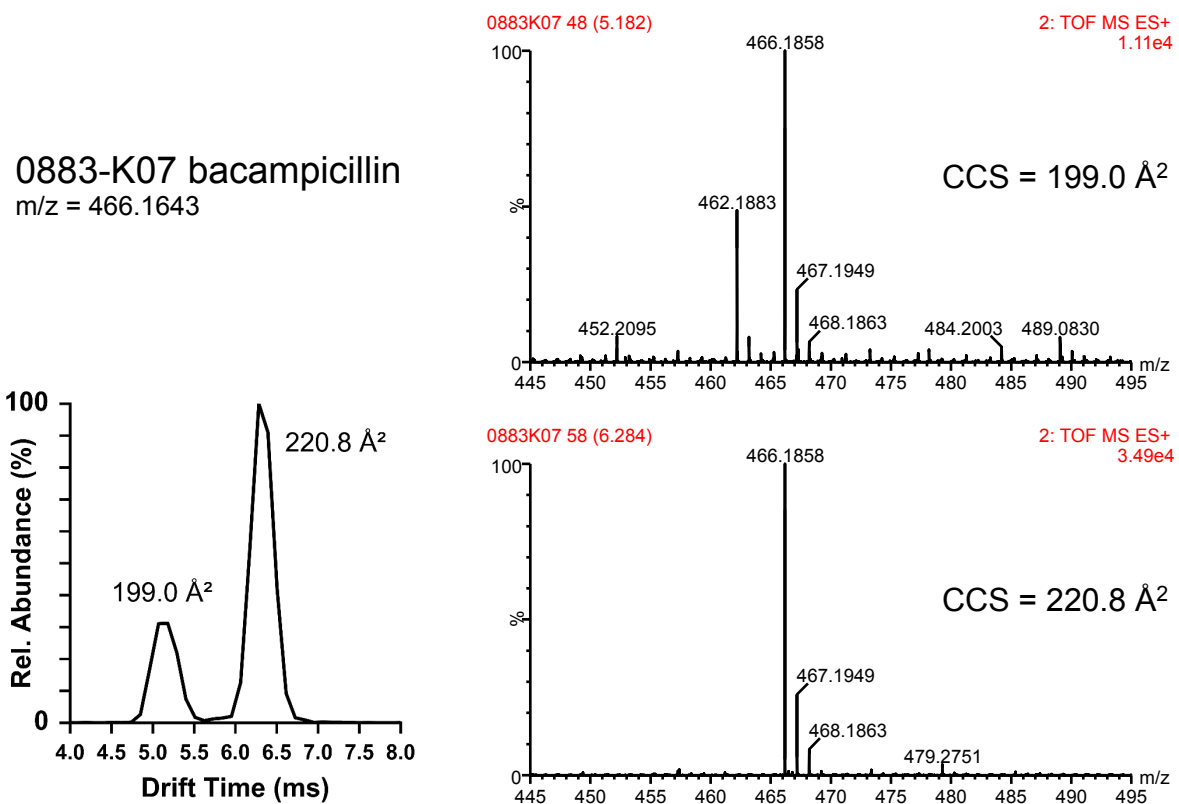

Figure SI-16. Drift time chromatogram and mass spectra of bacampicillin.

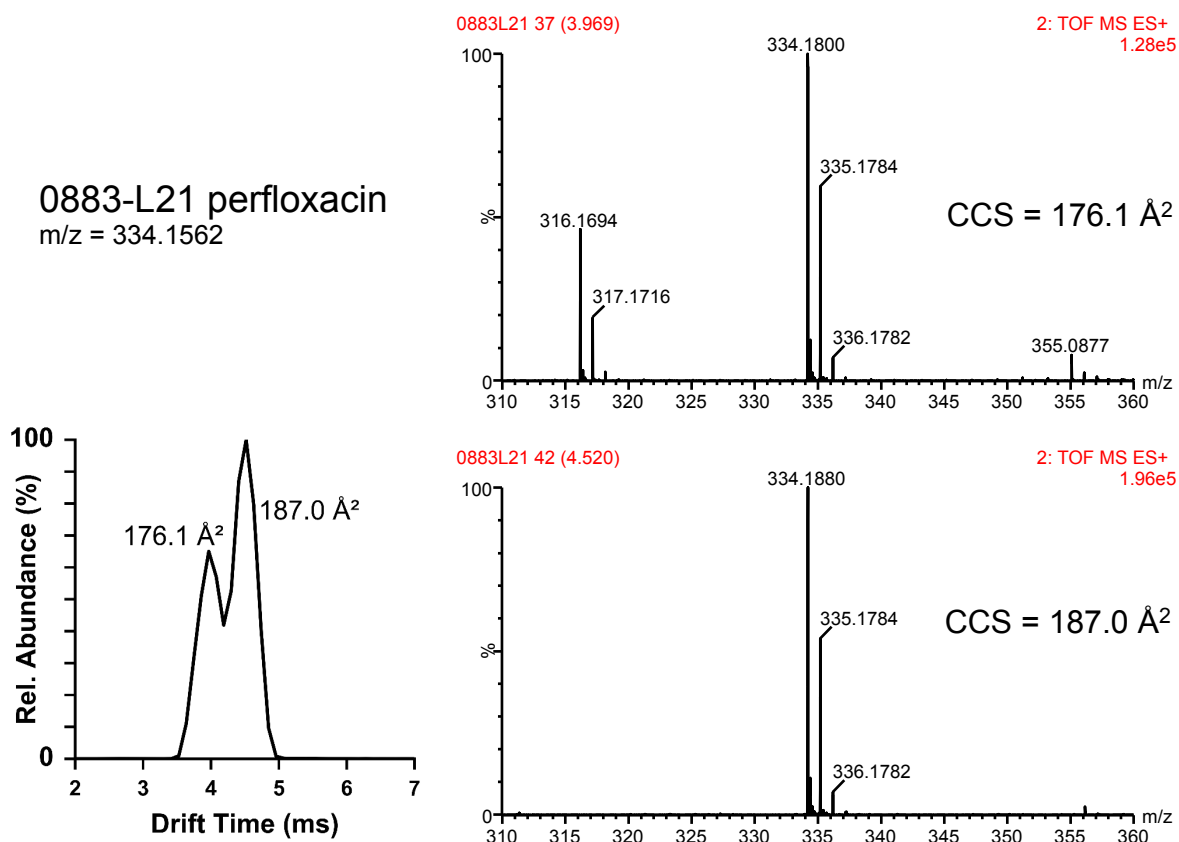

Figure SI-17. Drift time chromatogram and mass spectra of perfloxacin.

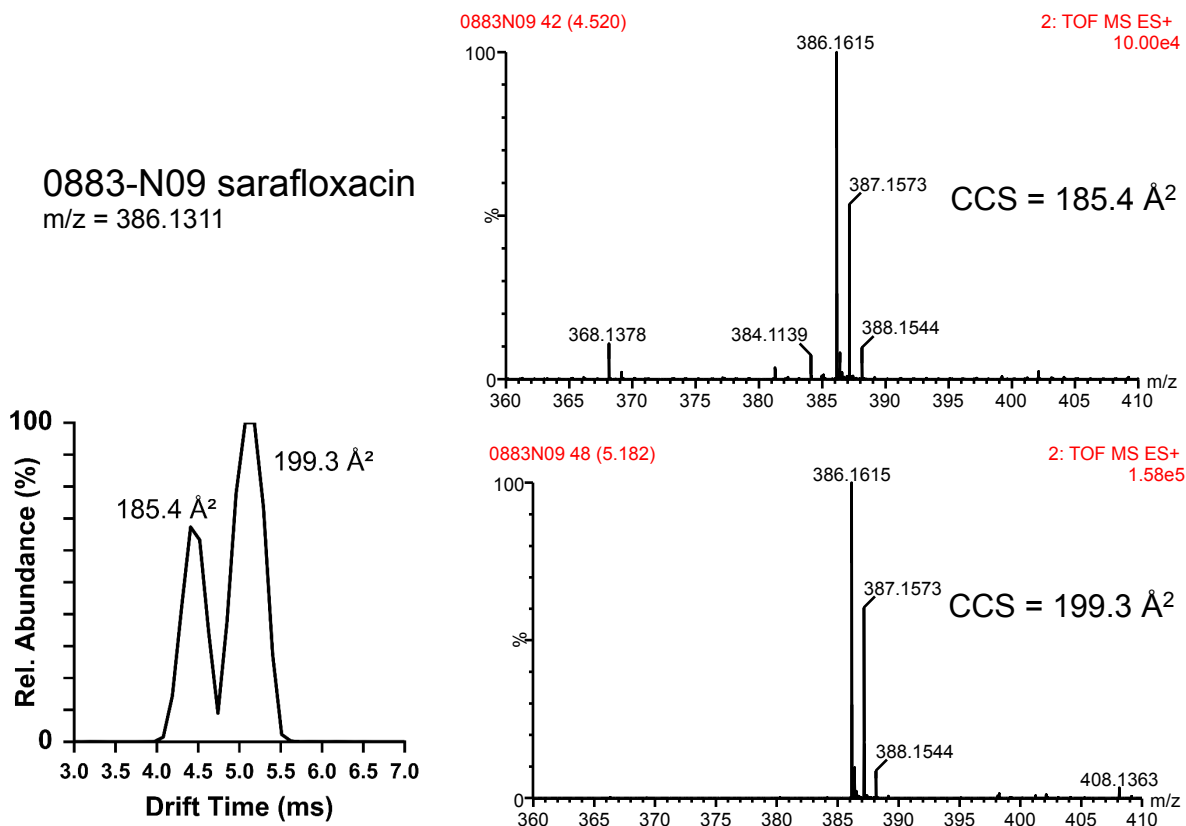

Figure SI-18. Drift time chromatogram and mass spectra of sarafloxacin.

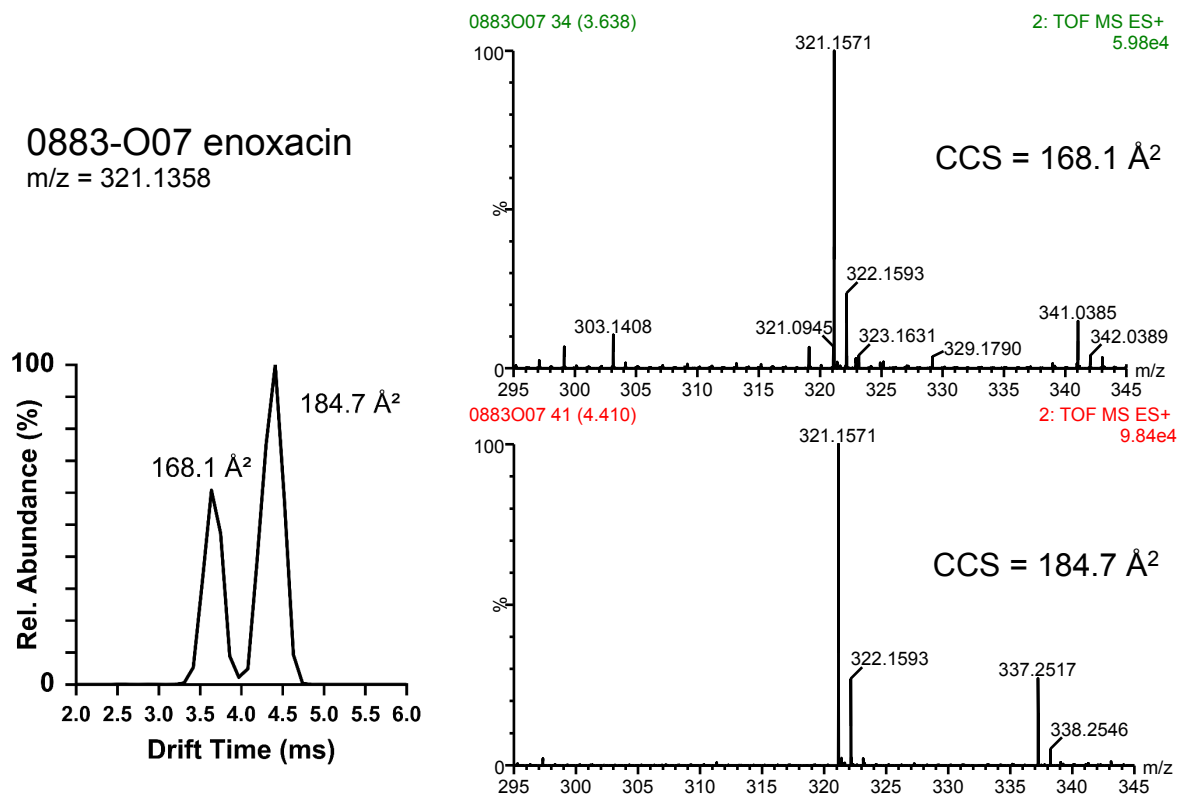

Figure SI-19. Drift time chromatogram and mass spectra of enoxacin.



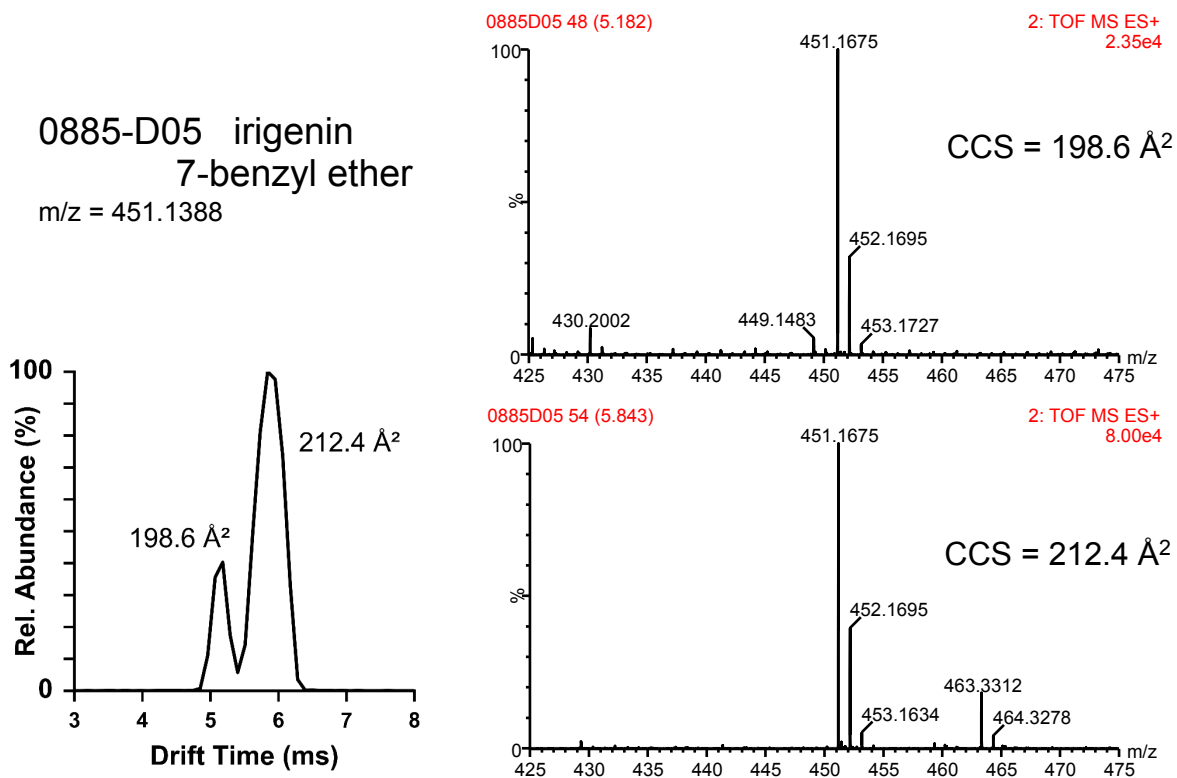

Figure SI-20. Drift time chromatogram and mass spectra of irigenin 7-benzyl ether.

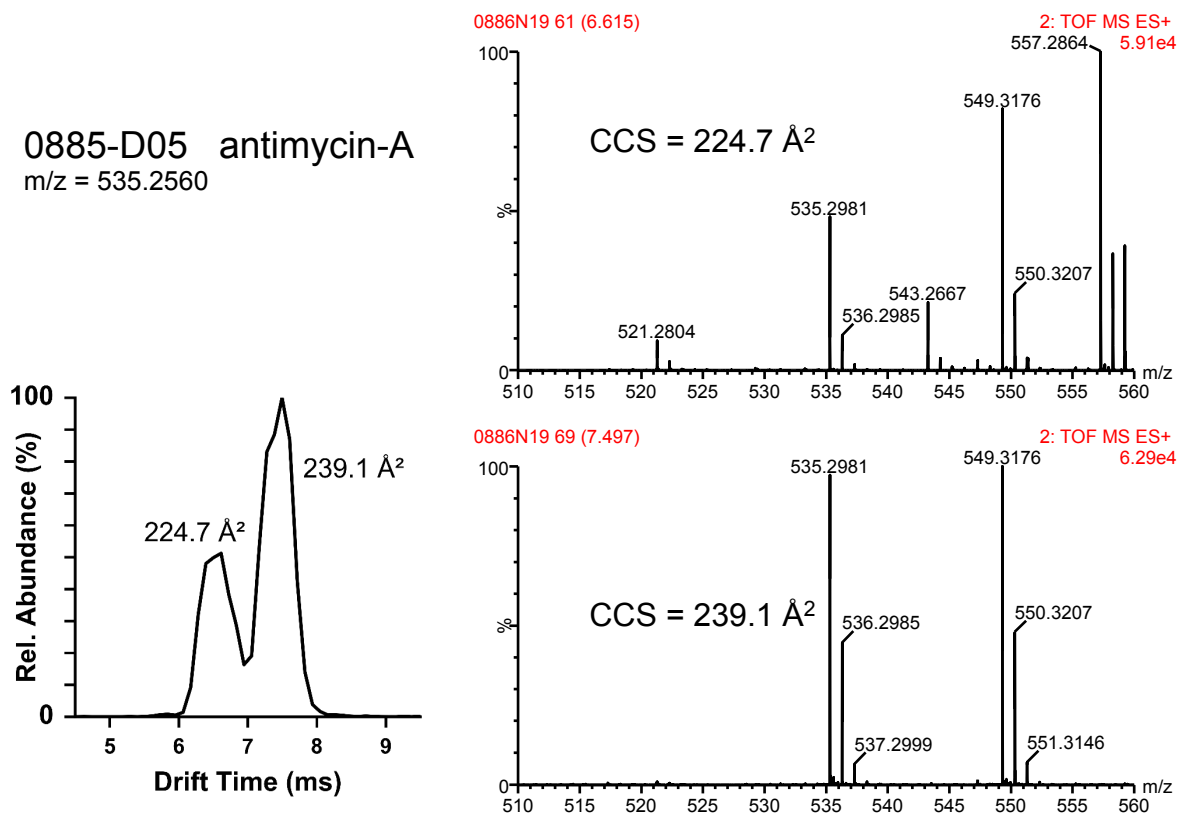

Figure SI-21. Drift time chromatogram and mass spectra of antimycin-A.

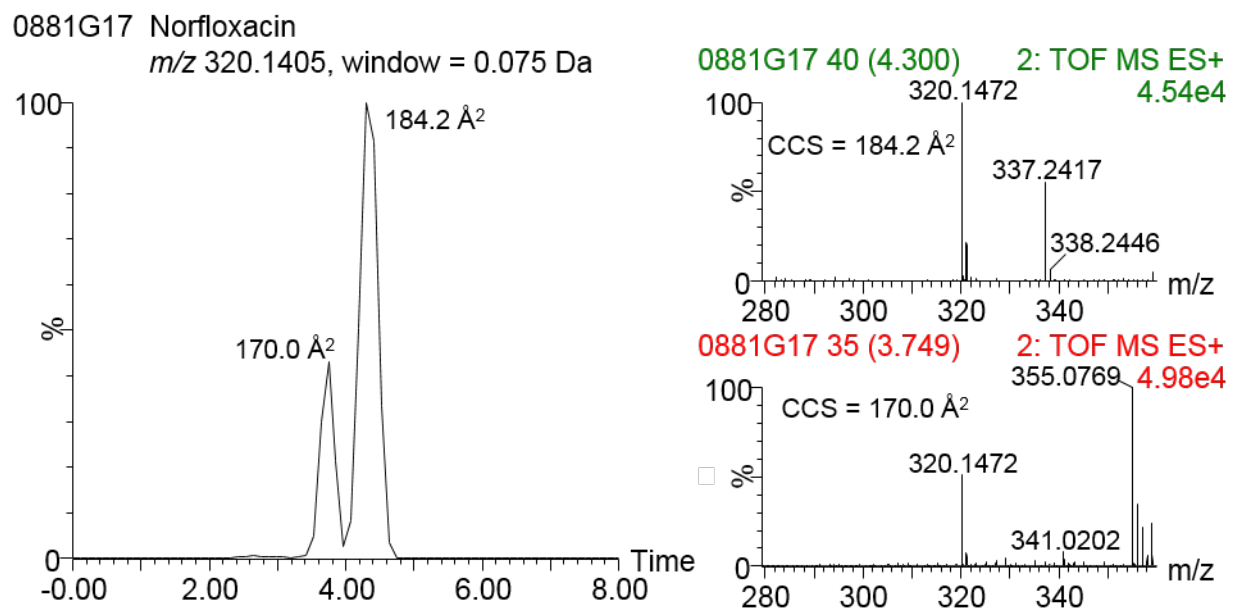

Figure SI-22. Drift time chromatogram and mass spectra of norfloxacin.

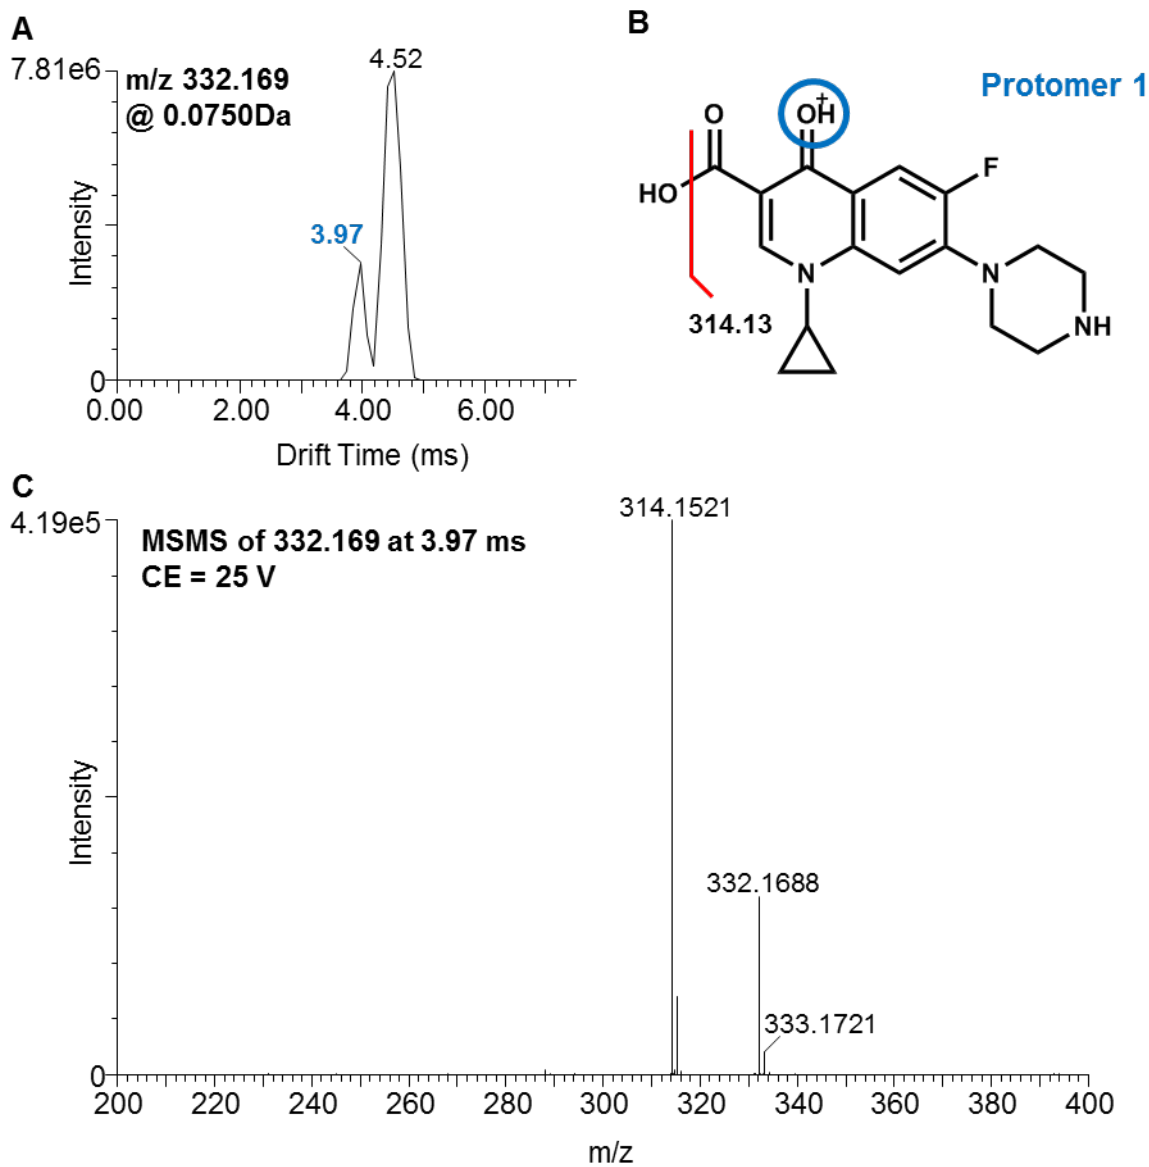

**Figure SI-23.** Post-ion mobility MS/MS analysis of the ciprofloxacin protomer with (A) a drift time of 3.97 ms corresponding to protonation of the ring carbonyl oxygen (B). The major fragments observed (C) are displayed on the structure shown in (B).

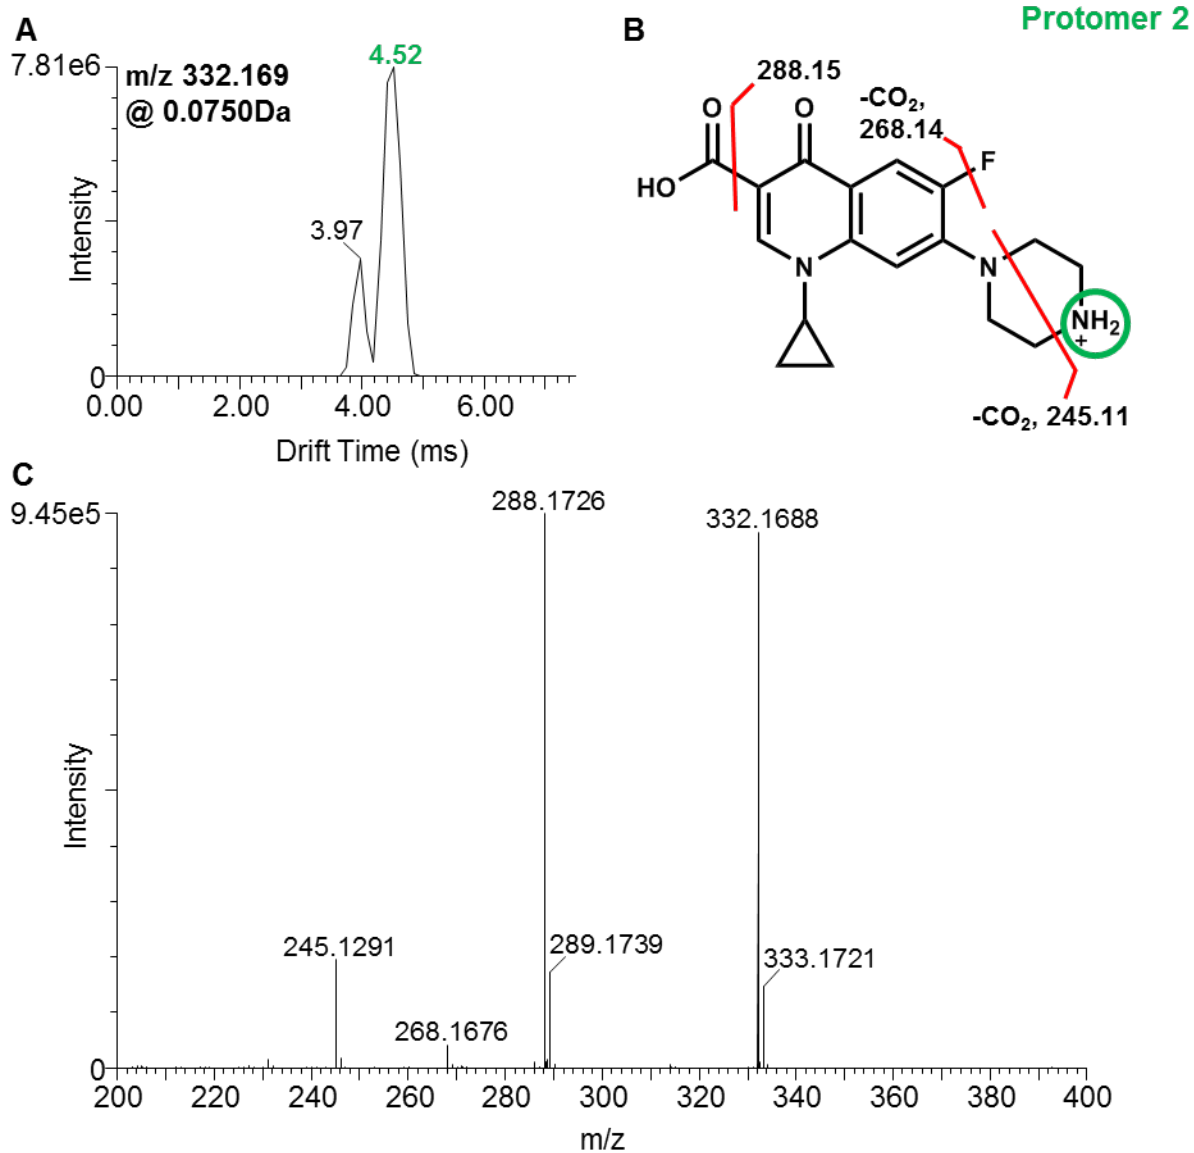

**Figure SI-24.** Post-ion mobility MS/MS analysis of the ciprofloxacin protomer with (A) a drift time of 4.52 ms corresponding to protonation of the terminal piperazine nitrogen (B). The major fragments observed (C) are displayed on the structure shown in (B).

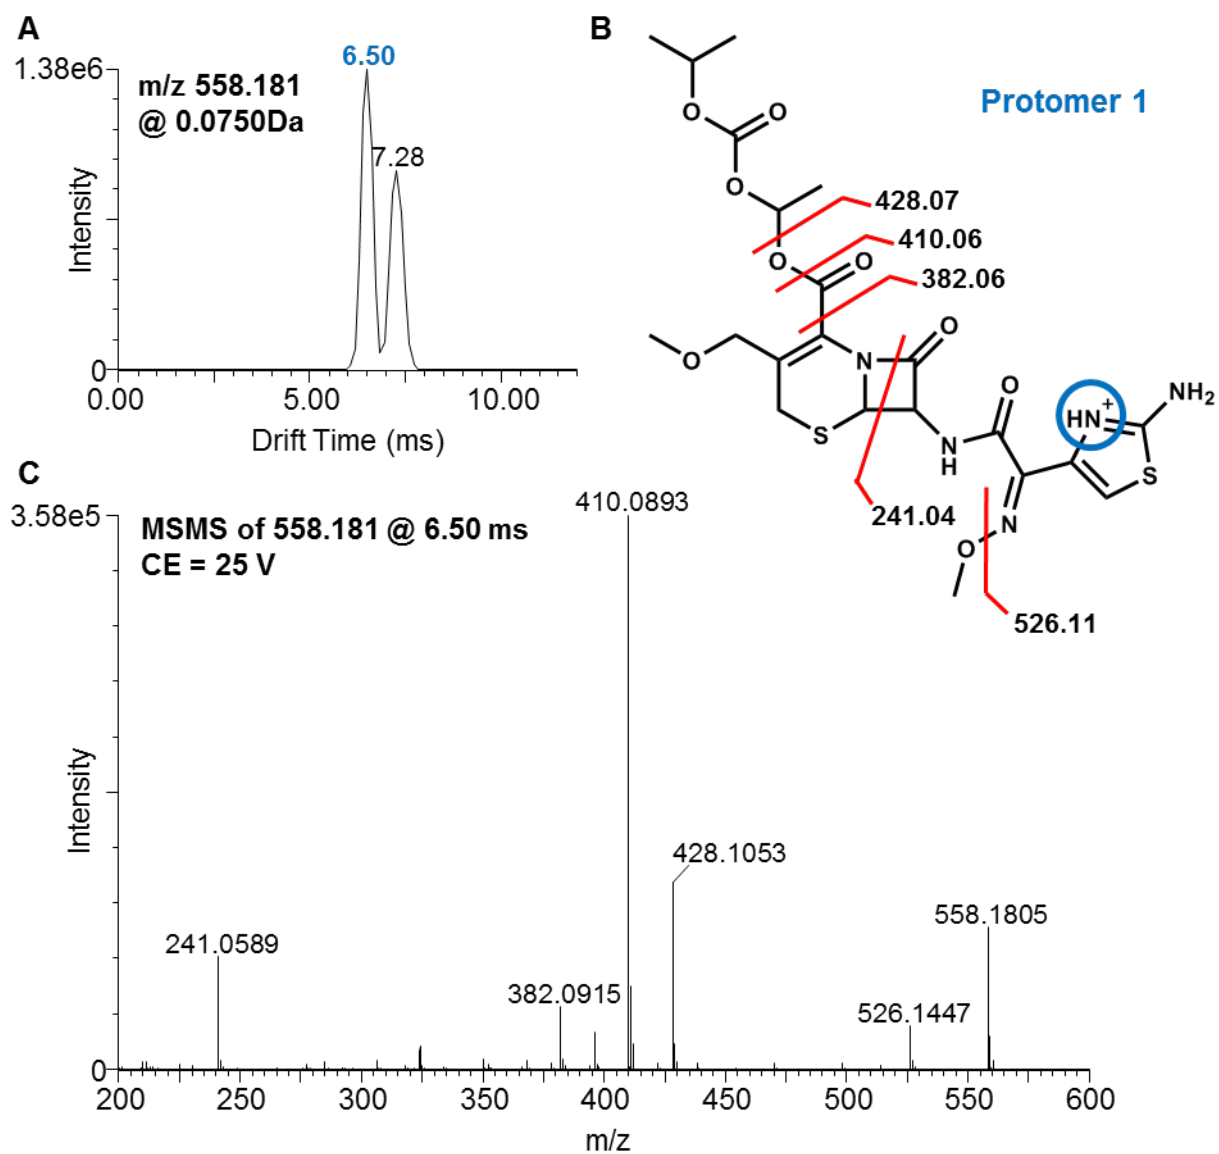

**Figure SI-25.** Post-ion mobility MS/MS analysis of the cefpodoxime proxetil protomer with (A) a drift time of 6.5 ms corresponding to protonation of the thiazole nitrogen (B). The major fragments observed (C) are displayed on the structure shown in (B).

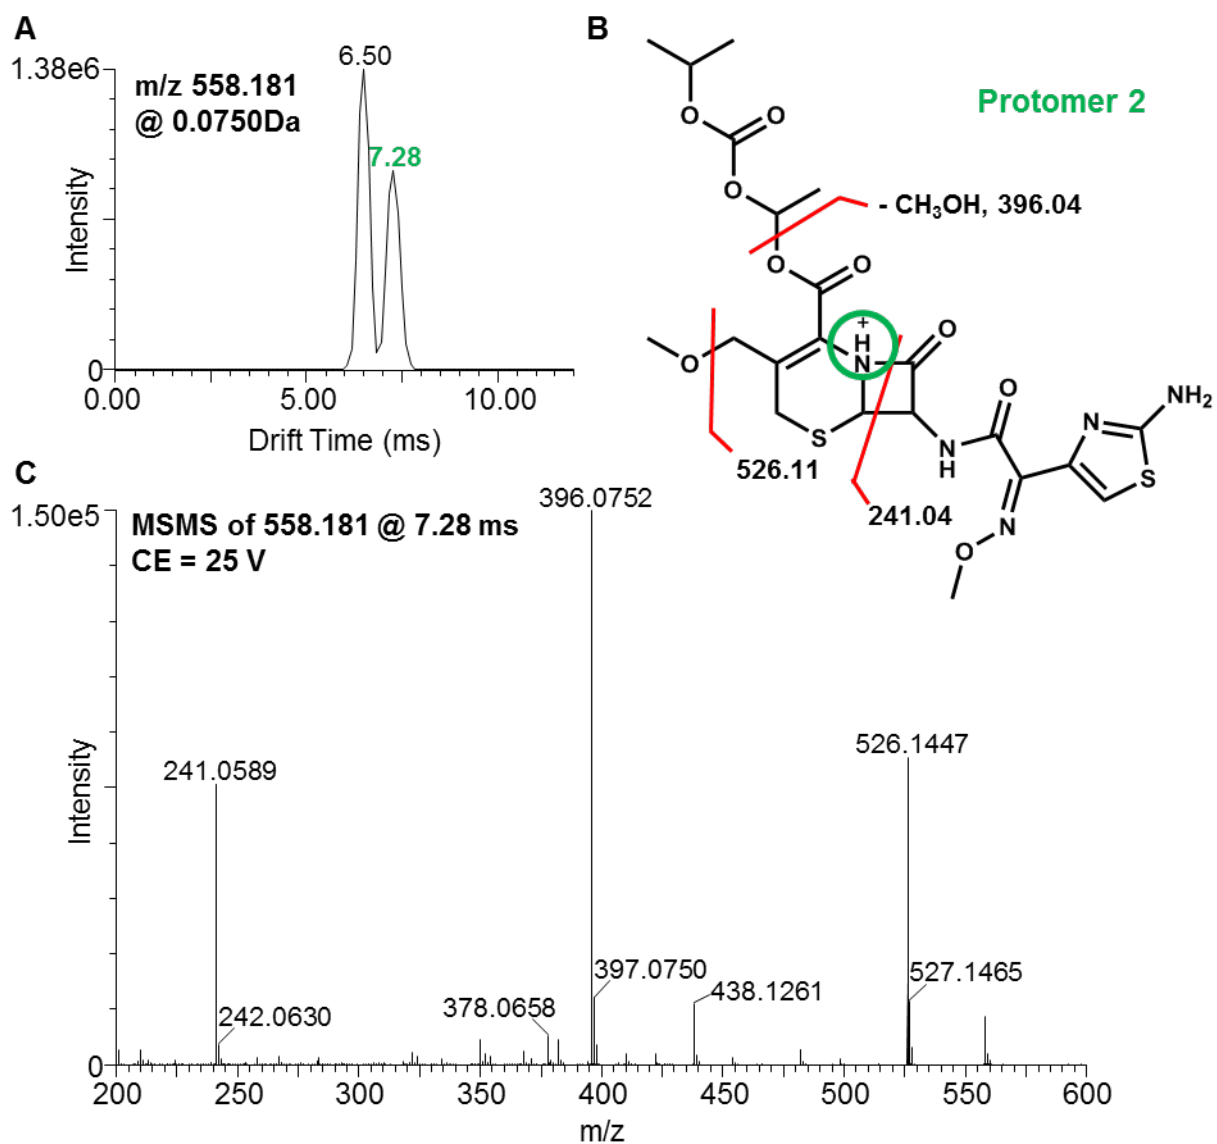

**Figure SI-26.** Post-ion mobility MS/MS analysis of the cefpodoxime proxetil protomer with (A) a drift time of 7.28 ms corresponding to protonation of the  $\beta$ -lactam nitrogen (B). The major fragments observed (C) are displayed on the structure shown in (B).

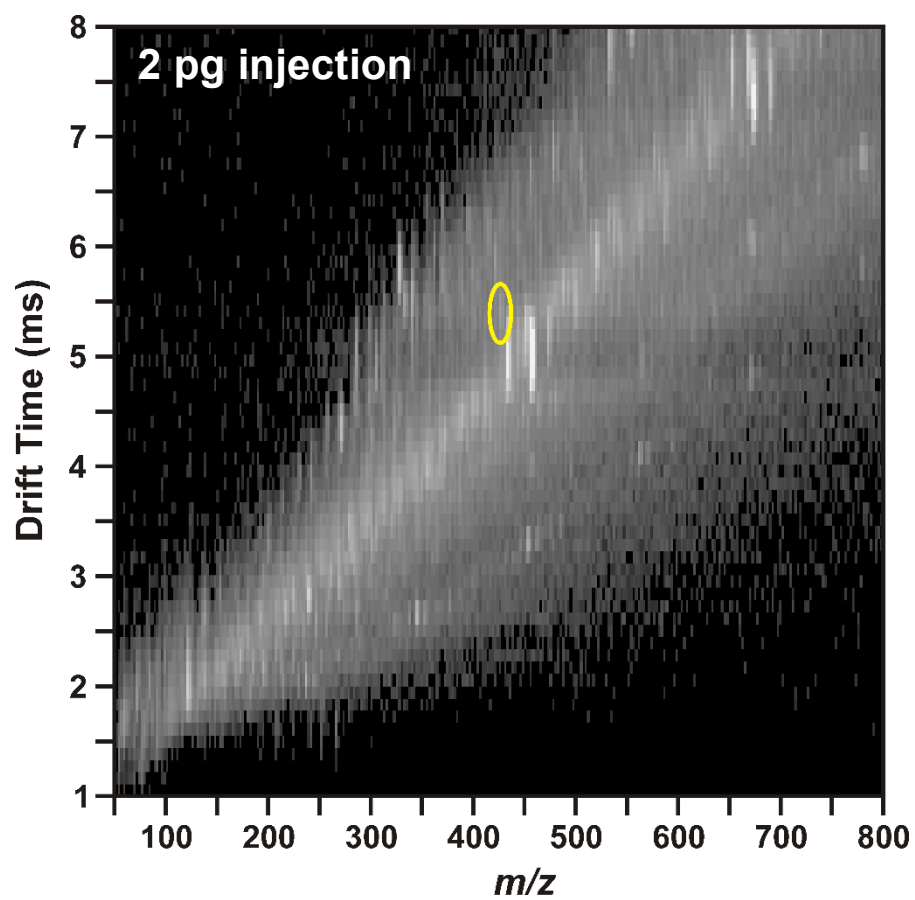

**Figure SI-27.** A 2D IM-MS plot from the analysis of a 300 mg capsule of clindamycin, which accompanies Figure 5 in the main text. The signal corresponding to protonated clindamycin,  $m/z$  425.18, is highlighted in the yellow oval.
